# Supplementary material for: FOXA2-Interacting FOXP2 Prevents Epithelial-Mesenchymal Transition of Breast Cancer Cells by Stimulating E-Cadherin and PHF2 Transcription
Source: PubMed Central journal article supplement (PMC7947682; doi:10.3389/fonc.2021.605025), 2021-02-25
Supplement: DataSheet_1.pdf [file DataSheet_1.pdf]

Suppl. Table: TCGA\_BRCA\_data\_set\_FOXA2\_FOXP2

| TCGA_id      | fustat | futime | gender | age | reoccur | type                           | histype | subgroup | sample | FOXA2       | FOXP2       |
|--------------|--------|--------|--------|-----|---------|--------------------------------|---------|----------|--------|-------------|-------------|
| TCGA-3C-AAAU | 0      | 3928   | female | 55  | 0       | infiltrating lobular carcinoma | 0       | LumB     | Tumor  | 6.44844218  | 6.724500402 |
| TCGA-5T-A9QA | 0      | 303    | female | 52  | 0       | other specify                  | 0       | Her2     | Tumor  | 6.86449188  | 7.605259407 |
| TCGA-A1-A0SK | 1      | 967    | female | 54  | 0       | other specify                  | 0       | Basal    | Tumor  | 9.38528446  | 11.61535111 |
| TCGA-A2-A04T | 0      | 2246   | female | 62  | 0       | infiltrating ductal carcinoma  | 0       | Basal    | Tumor  | 6.816977221 | 8.013170581 |
| TCGA-A2-A04U | 0      | 1486   | female | 47  | 0       | infiltrating ductal carcinoma  | 0       | Basal    | Tumor  | 6.83273544  | 6.763776804 |
| TCGA-A2-A04V | 1      | 1920   | female | 39  | 0       | infiltrating ductal carcinoma  | 0       | LumB     | Tumor  | 6.345576482 | 7.620693707 |
| TCGA-A2-A04W | 0      | 1948   | female | 50  | 0       | other specify                  | 0       | Her2     | Tumor  | 6.382344245 | 8.014214383 |
| TCGA-A2-A04X | 0      | 1686   | female | 34  | 0       | infiltrating ductal carcinoma  | 0       | Her2     | Tumor  | 6.331094907 | 6.829338046 |
| TCGA-A2-A04Y | 0      | 1099   | female | 53  | 0       | infiltrating ductal carcinoma  | 0       | LumB     | Tumor  | 6.320052725 | 7.492273197 |
| TCGA-A2-A0CQ | 0      | 2695   | female | 62  | 0       | infiltrating ductal carcinoma  | 0       | LumA     | Tumor  | 6.330632671 | 6.808160863 |
| TCGA-A2-AOCT | 0      | 2289   | female | 71  | 0       | infiltrating ductal carcinoma  | 0       | LumB     | Tumor  | 6.541339144 | 9.399134132 |
| TCGA-A2-AOCW | 0      | 1948   | female | 67  | 0       | infiltrating ductal carcinoma  | 0       | LumB     | Tumor  | 6.321568318 | 6.713957581 |
| TCGA-A2-AOCX | 0      | 1728   | female | 52  | 0       | infiltrating ductal carcinoma  | 0       | Her2     | Tumor  | 6.347793753 | 7.459114716 |
| TCGA-A2-AOCY | 0      | 1673   | female | 63  | 0       | infiltrating ductal carcinoma  | 0       | Her2     | Tumor  | 6.388614374 | 7.107803109 |
| TCGA-A2-AOCZ | 0      | 1616   | female | 46  | 0       | infiltrating ductal carcinoma  | 0       | Normal   | Tumor  | 6.435003076 | 8.804290102 |
| TCGA-A2-AOD1 | 0      | 1051   | female | 76  | 0       | infiltrating ductal carcinoma  | 0       | Her2     | Tumor  | 8.47446773  | 6.642647514 |
| TCGA-A2-AOD4 | 0      | 767    | female | 37  | 0       | infiltrating ductal carcinoma  | 0       | LumB     | Tumor  | 6.375645673 | 7.454023124 |
| TCGA-A2-AOEQ | 0      | 2426   | female | 64  | 0       | infiltrating ductal carcinoma  | 0       | Her2     | Tumor  | 6.693198658 | 6.944951662 |
| TCGA-A2-AOEV | 0      | 968    | female | 80  | 0       | infiltrating ductal carcinoma  | 0       | LumB     | Tumor  | 6.398514296 | 7.610398852 |
| TCGA-A2-AOST | 0      | 3017   | female | 62  | 0       | infiltrating ductal carcinoma  | 0       | Basal    | Tumor  | 6.425218807 | 7.230711149 |
| TCGA-A2-AOSU | 0      | 1662   | female | 66  | 0       | infiltrating ductal carcinoma  | 0       | LumA     | Tumor  | 6.35297138  | 7.817439449 |
| TCGA-A2-AOSW | 1      | 1365   | female | 82  | 0       | infiltrating ductal carcinoma  | 0       | LumB     | Tumor  | 6.426066772 | 7.681377074 |
| TCGA-A2-AOSX | 0      | 1288   | female | 48  | no      | infiltrating ductal carcinoma  | 0       | Basal    | Tumor  | 6.650682193 | 9.444538925 |
| TCGA-A2-AOSY | 0      | 1347   | female | 62  | 0       | infiltrating lobular carcinoma | 0       | LumA     | Tumor  | 6.332295471 | 8.144021334 |
| TCGA-A2-AOT3 | 0      | 569    | female | 37  | 0       | infiltrating ductal carcinoma  | 0       | LumB     | Tumor  | 6.327102933 | 8.164604518 |
| TCGA-A2-AOYH | 0      | 659    | female | 53  | 0       | infiltrating ductal carcinoma  | 0       | LumB     | Tumor  | 6.404553782 | 7.093890793 |
| TCGA-A2-AOYL | 0      | 445    | female | 48  | 0       | infiltrating lobular carcinoma | 0       | Normal   | Tumor  | 6.3233555   | 8.445642799 |
| TCGA-A2-AOYM | 0      | 965    | female | 67  | 0       | infiltrating ductal carcinoma  | 0       | Basal    | Tumor  | 7.072052763 | 7.65357788  |
| TCGA-A2-A1FV | 0      | 714    | female | 74  | 0       | infiltrating lobular carcinoma | 0       | LumA     | Tumor  | 6.320232792 | 8.399847791 |
| TCGA-A2-A1FW | 0      | 528    | female | 62  | 0       | infiltrating ductal carcinoma  | 0       | LumB     | Tumor  | 6.38641912  | 8.069148524 |
| TCGA-A2-A1FX | 0      | 1119   | female | 61  | 0       | infiltrating ductal carcinoma  | 0       | LumB     | Tumor  | 6.3093906   | 7.424655486 |
| TCGA-A2-A25C | 0      | 523    | female | 50  | 0       | infiltrating ductal carcinoma  | 0       | LumB     | Tumor  | 6.389510486 | 8.484222222 |

|              |   |      |        |    |     |                                  |   |        |        |             |             |
|--------------|---|------|--------|----|-----|----------------------------------|---|--------|--------|-------------|-------------|
| TCGA-A2-A25E | 0 | 2796 | female | 34 | 0   | infiltrating ductal carcinoma    | 0 | LumB   | Tumor  | 6.322974317 | 7.985653159 |
| TCGA-A2-A25F | 0 | 322  | female | 66 | 0   | infiltrating ductal carcinoma    | 0 | Basal  | Tumor  | 7.297926805 | 9.315604562 |
| TCGA-A2-A3XS | 1 | 1032 | female | 62 | 0   | infiltrating ductal carcinoma    | 0 | Basal  | Tumor  | 6.857520559 | 7.145124338 |
| TCGA-A2-A3XT | 0 | 2525 | female | 45 | 0   | infiltrating ductal carcinoma    | 0 | Basal  | Tumor  | 7.977959276 | 7.336266771 |
| TCGA-A2-A3XU | 1 | 912  | female | 35 | 0   | infiltrating ductal carcinoma    | 0 | Basal  | Tumor  | 6.552848634 | 8.696240166 |
| TCGA-A2-A3XV | 0 | 699  | female | 46 | 0   | infiltrating ductal carcinoma    | 0 | Her2   | Tumor  | 6.528835024 | 7.948283852 |
| TCGA-A2-A3XY | 0 | 1064 | female | 49 | 0   | infiltrating ductal carcinoma    | 0 | Basal  | Tumor  | 6.409229258 | 8.056719233 |
| TCGA-A2-A4RX | 0 | 742  | female | 67 | 0   | metaplastic carcinoma            | 0 | Basal  | Tumor  | 6.767347811 | 8.114701705 |
| TCGA-A2-A4S0 | 0 | 706  | female | 77 | 0   | mucinous carcinoma               | 0 | LumA   | Tumor  | 6.376216033 | 6.817586812 |
| TCGA-A2-A4S3 | 0 | 666  | female | 59 | 0   | infiltrating ductal carcinoma    | 0 | Her2   | Tumor  | 6.373261031 | 7.373108093 |
| TCGA-A7-A0CD | 0 | 372  | female | 66 | 0   | infiltrating ductal carcinoma    | 0 | LumA   | Tumor  | 6.382426371 | 7.116219875 |
| TCGA-A7-A0CG | 0 | 231  | female | 78 | 0   | mixed histology (please specify) | 0 | LumA   | Tumor  | 6.616825301 | 8.372353782 |
| TCGA-A7-A0CH | 0 | 233  | female | 79 | 0   | infiltrating ductal carcinoma    | 0 | LumA   | Tumor  | 7.103887674 | 7.886700575 |
| TCGA-A7-A0CH | 0 | 233  | female | 79 | 0   | infiltrating ductal carcinoma    | 0 | Normal | Normal | 6.841095976 | 9.090400364 |
| TCGA-A7-A0D9 | 0 | 273  | female | 37 | 0   | infiltrating ductal carcinoma    | 0 | Normal | Normal | 6.52164009  | 10.1932104  |
| TCGA-A7-A0D9 | 0 | 273  | female | 37 | 0   | infiltrating ductal carcinoma    | 0 | LumA   | Tumor  | 6.342673293 | 7.562156305 |
| TCGA-A7-A0DA | 0 | 373  | female | 62 | 0   | infiltrating ductal carcinoma    | 0 | Basal  | Tumor  | 6.449263207 | 7.326034913 |
| TCGA-A7-A0DB | 0 | 267  | female | 56 | 0   | infiltrating ductal carcinoma    | 0 | LumA   | Tumor  | 6.458387921 | 8.204539974 |
| TCGA-A7-A0DC | 0 | 386  | female | 63 | 0   | infiltrating ductal carcinoma    | 0 | LumA   | Tumor  | 6.353112207 | 7.017826153 |
| TCGA-A7-A13D | 0 | 267  | female | 46 | 0   | infiltrating ductal carcinoma    | 0 | Basal  | Tumor  | 7.021550502 | 10.26725825 |
| TCGA-A7-A13D | 0 | 267  | female | 46 | 0   | infiltrating ductal carcinoma    | 0 | Basal  | Tumor  | 6.464557876 | 7.876536795 |
| TCGA-A7-A13E | 0 | 326  | female | 62 | yes | infiltrating ductal carcinoma    | 0 | Basal  | Tumor  | 6.904433501 | 9.085236747 |
| TCGA-A7-A13E | 0 | 326  | female | 62 | yes | infiltrating ductal carcinoma    | 0 | Basal  | Tumor  | 6.353018427 | 7.185690034 |
| TCGA-A7-A13G | 0 | 348  | female | 79 | 0   | infiltrating ductal carcinoma    | 0 | LumA   | Tumor  | 6.373174878 | 8.539882371 |
| TCGA-A7-A13H | 0 | 740  | female | 61 | 0   | infiltrating lobular carcinoma   | 0 | LumA   | Tumor  | 6.322672724 | 7.725984669 |
| TCGA-A7-A26J | 0 | 369  | female | 49 | 0   | infiltrating ductal carcinoma    | 0 | LumB   | Tumor  | 6.311900665 | 7.731574625 |
| TCGA-A7-A3RF | 0 | 408  | female | 79 | 0   | mucinous carcinoma               | 0 | LumB   | Tumor  | 6.337387073 | 6.611668508 |
| TCGA-A7-A4SE | 0 | 644  | female | 54 | 0   | infiltrating ductal carcinoma    | 0 | Basal  | Tumor  | 6.377520713 | 8.004699394 |
| TCGA-A7-A56D | 0 | 448  | female | 84 | 0   | infiltrating ductal carcinoma    | 0 | Her2   | Tumor  | 6.419746366 | 7.664739574 |
| TCGA-A8-A06R | 0 | 547  | female | 69 | 0   | infiltrating ductal carcinoma    | 0 | LumB   | Tumor  | 6.456054846 | 7.745571785 |
| TCGA-A8-A06T | 0 | 1614 | female | 75 | 0   | infiltrating ductal carcinoma    | 0 | LumB   | Tumor  | 6.368408876 | 7.699445482 |
| TCGA-A8-A06X | 1 | 943  | female | 77 | 0   | infiltrating ductal carcinoma    | 0 | LumB   | Tumor  | 6.371182633 | 6.888944875 |
| TCGA-A8-A06Y | 0 | 791  | female | 66 | 0   | infiltrating ductal carcinoma    | 0 | LumA   | Tumor  | 6.481267329 | 8.081092643 |
| TCGA-A8-A075 | 0 | 518  | female | 42 | 0   | infiltrating ductal carcinoma    | 0 | Her2   | Tumor  | 6.404975536 | 7.647992805 |
| TCGA-A8-A076 | 0 | 1642 | female | 66 | 0   | infiltrating ductal carcinoma    | 0 | Her2   | Tumor  | 6.380839082 | 7.819987446 |

|              |   |      |        |    |   |                                  |   |        |       |             |             |
|--------------|---|------|--------|----|---|----------------------------------|---|--------|-------|-------------|-------------|
| TCGA-A8-A07B | 0 | 1308 | female | 69 | 0 | infiltrating ductal carcinoma    | 0 | Her2   | Tumor | 7.598957251 | 7.655817608 |
| TCGA-A8-A07E | 0 | 608  | female | 81 | 0 | infiltrating ductal carcinoma    | 0 | Basal  | Tumor | 6.316009706 | 8.417395091 |
| TCGA-A8-A07F | 0 | 577  | female | 65 | 0 | infiltrating ductal carcinoma    | 0 | Her2   | Tumor | 6.492303909 | 9.866998863 |
| TCGA-A8-A07G | 0 | 577  | female | 65 | 0 | infiltrating ductal carcinoma    | 0 | LumA   | Tumor | 6.328059891 | 8.448533601 |
| TCGA-A8-A07O | 0 | 304  | female | 51 | 0 | infiltrating ductal carcinoma    | 0 | Basal  | Tumor | 6.436187849 | 9.307816615 |
| TCGA-A8-A07P | 0 | 334  | female | 68 | 0 | infiltrating ductal carcinoma    | 0 | LumB   | Tumor | 6.336460859 | 7.704311766 |
| TCGA-A8-A07S | 0 | 243  | female | 73 | 0 | nixed histology (please specify) | 0 | LumB   | Tumor | 6.400126564 | 7.192134275 |
| TCGA-A8-A082 | 0 | -31  | female | 58 | 0 | infiltrating ductal carcinoma    | 0 | LumB   | Tumor | 6.416971915 | 7.080493506 |
| TCGA-A8-A084 | 0 | 458  | female | 81 | 0 | infiltrating ductal carcinoma    | 0 | LumB   | Tumor | 6.343547632 | 7.19130622  |
| TCGA-A8-A086 | 0 | 396  | female | 59 | 0 | infiltrating ductal carcinoma    | 0 | LumB   | Tumor | 6.323102842 | 7.298564369 |
| TCGA-A8-A08B | 0 | 1156 | female | 52 | 0 | infiltrating ductal carcinoma    | 0 | Her2   | Tumor | 8.079299926 | 7.365409389 |
| TCGA-A8-A08C | 0 | 881  | female | 65 | 0 | infiltrating ductal carcinoma    | 0 | LumA   | Tumor | 6.571039895 | 7.223769359 |
| TCGA-A8-A08G | 0 | 607  | female | 41 | 0 | infiltrating ductal carcinoma    | 0 | LumB   | Tumor | 6.456213009 | 7.210788838 |
| TCGA-A8-A08I | 0 | 365  | female | 53 | 0 | infiltrating ductal carcinoma    | 0 | LumB   | Tumor | 6.345691569 | 6.887945432 |
| TCGA-A8-A08L | 1 | 304  | female | 89 | 0 | infiltrating ductal carcinoma    | 0 | Her2   | Tumor | 6.593831098 | 6.969729288 |
| TCGA-A8-A08O | 0 | 943  | female | 45 | 0 | infiltrating ductal carcinoma    | 0 | LumA   | Tumor | 6.347372765 | 8.076782967 |
| TCGA-A8-A08P | 0 | 943  | female | 70 | 0 | infiltrating ductal carcinoma    | 0 | LumB   | Tumor | 7.05399111  | 7.467016123 |
| TCGA-A8-A08S | 0 | 1004 | female | 71 | 0 | infiltrating ductal carcinoma    | 0 | LumB   | Tumor | 6.327282972 | 7.215248262 |
| TCGA-A8-A08X | 0 | 1308 | female | 43 | 0 | infiltrating ductal carcinoma    | 0 | Her2   | Tumor | 6.67899547  | 7.507403745 |
| TCGA-A8-A091 | 0 | 1004 | female | 61 | 0 | infiltrating ductal carcinoma    | 0 | LumA   | Tumor | 6.360009625 | 7.887142612 |
| TCGA-A8-A092 | 0 | 942  | female | 48 | 0 | infiltrating ductal carcinoma    | 0 | Her2   | Tumor | 6.430386749 | 6.943271827 |
| TCGA-A8-A095 | 0 | 1277 | female | 45 | 0 | infiltrating ductal carcinoma    | 0 | LumB   | Tumor | 6.917791964 | 7.687136588 |
| TCGA-A8-A099 | 0 | 304  | female | 76 | 0 | infiltrating ductal carcinoma    | 0 | LumA   | Tumor | 6.321817911 | 7.280139171 |
| TCGA-A8-A09E | 0 | 1492 | female | 73 | 0 | infiltrating ductal carcinoma    | 0 | LumB   | Tumor | 6.346330139 | 7.149941772 |
| TCGA-A8-A09K | 0 | 912  | female | 68 | 0 | infiltrating ductal carcinoma    | 0 | LumB   | Tumor | 6.422381891 | 7.115720503 |
| TCGA-A8-A09M | 0 | 1006 | female | 75 | 0 | infiltrating ductal carcinoma    | 0 | LumB   | Tumor | 6.404347127 | 7.004635344 |
| TCGA-A8-A09Q | 0 | 761  | female | 83 | 0 | infiltrating ductal carcinoma    | 0 | LumB   | Tumor | 6.327387666 | 8.547883247 |
| TCGA-A8-A09R | 0 | 273  | female | 82 | 0 | infiltrating ductal carcinoma    | 0 | LumB   | Tumor | 6.425931056 | 7.565415809 |
| TCGA-A8-A09T | 0 | 579  | female | 68 | 0 | infiltrating lobular carcinoma   | 0 | LumB   | Tumor | 7.460950973 | 7.373772663 |
| TCGA-A8-A0A4 | 0 | 396  | female | 73 | 0 | infiltrating lobular carcinoma   | 0 | Normal | Tumor | 6.416128314 | 8.640969946 |
| TCGA-A8-A0A6 | 0 | 640  | female | 64 | 0 | infiltrating lobular carcinoma   | 0 | LumA   | Tumor | 6.367828002 | 7.231081409 |
| TCGA-A8-A0AD | 0 | 1157 | female | 83 | 0 | nixed histology (please specify) | 0 | LumA   | Tumor | 6.356715945 | 7.982714428 |
| TCGA-AC-A2B8 | 0 | 677  | female | 84 | 0 | infiltrating lobular carcinoma   | 0 | LumA   | Tumor | 6.305465013 | 8.352377722 |
| TCGA-AC-A2FK | 0 | 2650 | female | 45 | 0 | infiltrating lobular carcinoma   | 0 | Normal | Tumor | 6.346444139 | 8.52184482  |
| TCGA-AC-A2QH | 0 | 1005 | female | 58 | 0 | metaplastic carcinoma            | 0 | Basal  | Tumor | 7.113509322 | 12.81178497 |

|              |   |      |        |    |     |                                |   |        |       |             |             |
|--------------|---|------|--------|----|-----|--------------------------------|---|--------|-------|-------------|-------------|
| TCGA-AC-A2QI | 0 | 588  | female | 76 | 0   | infiltrating lobular carcinoma | 0 | LumA   | Tumor | 6.324528824 | 7.851264845 |
| TCGA-AC-A3W5 | 0 | 504  | female | 65 | 0   | infiltrating lobular carcinoma | 0 | Her2   | Tumor | 6.412592061 | 7.807649956 |
| TCGA-AC-A3W7 | 0 | 471  | female | 66 | 0   | infiltrating lobular carcinoma | 0 | LumA   | Tumor | 6.661211076 | 7.798811935 |
| TCGA-AC-A6IV | 0 | 568  | female | 47 | 0   | infiltrating lobular carcinoma | 0 | Normal | Tumor | 6.488892419 | 8.228635929 |
| TCGA-AC-A6IW | 0 | 413  | female | 73 | 0   | infiltrating ductal carcinoma  | 0 | Basal  | Tumor | 6.327713512 | 7.049710039 |
| TCGA-AC-A6IX | 0 | 373  | female | 49 | 0   | infiltrating lobular carcinoma | 0 | LumA   | Tumor | 6.449757138 | 8.116774084 |
| TCGA-AC-A6IX | 0 | 373  | female | 49 | 0   | infiltrating lobular carcinoma | 0 | LumA   | Tumor | 6.314951278 | 7.610961368 |
| TCGA-AC-A7VB | 0 | 250  | female | 51 | 0   | infiltrating ductal carcinoma  | 0 | LumB   | Tumor | 6.318511349 | 7.508703829 |
| TCGA-AN-AO3X | 0 | 10   | female | 74 | 0   | infiltrating ductal carcinoma  | 0 | LumB   | Tumor | 6.399989037 | 8.633728592 |
| TCGA-AN-AO3Y | 0 | 10   | female | 66 | 0   | infiltrating ductal carcinoma  | 0 | LumB   | Tumor | 6.337566559 | 7.378824679 |
| TCGA-AN-AO41 | 0 | 7    | female | 29 | 0   | infiltrating ductal carcinoma  | 0 | LumB   | Tumor | 6.328617435 | 7.456009495 |
| TCGA-AN-AO46 | 0 | 10   | female | 68 | 0   | infiltrating ductal carcinoma  | 0 | LumB   | Tumor | 6.33788503  | 7.738893349 |
| TCGA-AN-AO49 | 0 | 19   | female | 62 | 0   | infiltrating ductal carcinoma  | 0 | LumB   | Tumor | 6.424220644 | 7.60595105  |
| TCGA-AN-AO4A | 0 | 90   | female | 36 | 0   | infiltrating ductal carcinoma  | 0 | Normal | Tumor | 6.335293795 | 7.937521602 |
| TCGA-AN-AO4C | 0 | 54   | female | 51 | 0   | infiltrating ductal carcinoma  | 0 | Her2   | Tumor | 6.4067673   | 6.964160791 |
| TCGA-AN-AO4D | 0 | 52   | female | 58 | 0   | infiltrating ductal carcinoma  | 0 | Basal  | Tumor | 7.38999694  | 6.56887884  |
| TCGA-AN-AOAJ | 0 | 303  | female | 79 | 0   | infiltrating ductal carcinoma  | 0 | LumB   | Tumor | 6.568963577 | 7.206749297 |
| TCGA-AN-AOAK | 0 | 224  | female | 76 | 0   | infiltrating ductal carcinoma  | 0 | LumB   | Tumor | 6.353688127 | 6.961816768 |
| TCGA-AN-AOAL | 0 | 227  | female | 41 | 0   | infiltrating ductal carcinoma  | 0 | Basal  | Tumor | 6.477647573 | 7.469711853 |
| TCGA-AN-AOAM | 0 | 5    | female | 56 | 0   | infiltrating ductal carcinoma  | 0 | Her2   | Tumor | 6.728150591 | 7.389438717 |
| TCGA-AN-AOAR | 0 | 10   | female | 55 | 0   | infiltrating ductal carcinoma  | 0 | Basal  | Tumor | 6.541487462 | 6.975824075 |
| TCGA-AN-AOAS | 0 | 10   | female | 70 | 0   | infiltrating ductal carcinoma  | 0 | LumB   | Tumor | 7.104964151 | 8.774327091 |
| TCGA-AN-AOFK | 0 | 213  | female | 88 | 0   | infiltrating ductal carcinoma  | 0 | LumB   | Tumor | 6.344906538 | 7.049419194 |
| TCGA-AN-AOFS | 0 | 210  | female | 55 | 0   | infiltrating ductal carcinoma  | 0 | LumA   | Tumor | 6.362850054 | 8.230391739 |
| TCGA-AN-AOFW | 0 | 11   | female | 67 | 0   | infiltrating ductal carcinoma  | 0 | LumB   | Tumor | 6.388085985 | 7.600254417 |
| TCGA-AN-AOFX | 0 | 10   | female | 52 | 0   | infiltrating ductal carcinoma  | 0 | Basal  | Tumor | 6.67690941  | 9.082349714 |
| TCGA-AN-AOFY | 0 | 10   | female | 55 | 0   | infiltrating ductal carcinoma  | 0 | LumB   | Tumor | 6.311814393 | 7.563564234 |
| TCGA-AN-AOGO | 0 | 16   | female | 56 | 0   | infiltrating ductal carcinoma  | 0 | Basal  | Tumor | 8.330637675 | 7.358976897 |
| TCGA-AN-AOXN | 0 | 10   | female | 68 | 0   | infiltrating ductal carcinoma  | 0 | Her2   | Tumor | 6.367061148 | 9.473332688 |
| TCGA-AN-AOXS | 0 | 10   | female | 63 | 0   | infiltrating ductal carcinoma  | 0 | LumA   | Tumor | 6.327360493 | 8.172028123 |
| TCGA-AN-AOXU | 0 | 10   | female | 54 | 0   | infiltrating ductal carcinoma  | 0 | Basal  | Tumor | 6.618570697 | 7.07022319  |
| TCGA-AO-AO3N | 0 | 1645 | female | 59 | yes | infiltrating ductal carcinoma  | 0 | Her2   | Tumor | 6.707413243 | 8.129607806 |
| TCGA-AO-AO3O | 1 | 2483 | female | 69 | 0   | infiltrating ductal carcinoma  | 0 | LumB   | Tumor | 6.789838759 | 7.273044731 |
| TCGA-AO-AO3R | 0 | 1707 | female | 57 | no  | infiltrating ductal carcinoma  | 0 | Basal  | Tumor | 6.989091457 | 7.248920565 |
| TCGA-AO-AO3V | 0 | 886  | female | 41 | no  | infiltrating ductal carcinoma  | 0 | LumA   | Tumor | 6.341065324 | 7.780954071 |

|              |   |      |        |    |     |                                  |   |        |       |             |             |
|--------------|---|------|--------|----|-----|----------------------------------|---|--------|-------|-------------|-------------|
| TCGA-AO-AOJ4 | 0 | 294  | female | 41 | no  | infiltrating ductal carcinoma    | 0 | Basal  | Tumor | 7.660257942 | 8.124971715 |
| TCGA-AO-AOJB | 0 | 1150 | female | 50 | no  | infiltrating ductal carcinoma    | 0 | Basal  | Tumor | 7.082084368 | 7.866502534 |
| TCGA-AO-AOJC | 0 | 1547 | female | 64 | no  | infiltrating ductal carcinoma    | 0 | Basal  | Tumor | 6.418963503 | 7.853958482 |
| TCGA-AO-AOJD | 0 | 1813 | female | 59 | no  | infiltrating ductal carcinoma    | 0 | Basal  | Tumor | 6.345127757 | 7.503042438 |
| TCGA-AO-AOJE | 0 | 1966 | female | 53 | no  | infiltrating ductal carcinoma    | 0 | Her2   | Tumor | 6.34321141  | 7.879317236 |
| TCGA-AO-AOJI | 0 | 1172 | female | 56 | no  | infiltrating ductal carcinoma    | 0 | LumA   | Tumor | 6.343791501 | 8.871321726 |
| TCGA-AO-AOJJ | 0 | 1512 | female | 54 | no  | infiltrating lobular carcinoma   | 0 | LumA   | Tumor | 6.402764259 | 9.145968508 |
| TCGA-AO-A125 | 0 | 3019 | female | 72 | no  | other specify                    | 0 | LumA   | Tumor | 6.553413373 | 6.169827717 |
| TCGA-AO-A1KS | 0 | 16   | female | 69 | no  | infiltrating lobular carcinoma   | 0 | LumB   | Tumor | 6.388227746 | 7.77851742  |
| TCGA-AQ-A1H3 | 0 | 402  | female | 49 | 0   | infiltrating ductal carcinoma    | 0 | LumA   | Tumor | 6.312313029 | 8.197752019 |
| TCGA-AR-AOTP | 0 | 2521 | female | 43 | 0   | infiltrating ductal carcinoma    | 0 | Basal  | Tumor | 7.269139888 | 6.874995864 |
| TCGA-AR-AOTR | 1 | 160  | female | 68 | 0   | infiltrating ductal carcinoma    | 0 | LumA   | Tumor | 6.315239571 | 6.650087844 |
| TCGA-AR-AOTS | 0 | 1138 | female | 46 | 0   | infiltrating ductal carcinoma    | 0 | Basal  | Tumor | 7.441495527 | 7.545524599 |
| TCGA-AR-AOU0 | 0 | 1988 | female | 73 | 0   | infiltrating ductal carcinoma    | 0 | Basal  | Tumor | 6.346489589 | 6.475434559 |
| TCGA-AR-AOU2 | 1 | 2551 | female | 47 | 0   | infiltrating ductal carcinoma    | 0 | Her2   | Tumor | 6.518559992 | 7.30012886  |
| TCGA-AR-AOU4 | 0 | 1684 | female | 54 | 0   | infiltrating ductal carcinoma    | 0 | Basal  | Tumor | 6.504102543 | 7.740844737 |
| TCGA-AR-A1AN | 0 | 1330 | female | 46 | 0   | infiltrating ductal carcinoma    | 0 | LumA   | Tumor | 6.333420745 | 8.376208821 |
| TCGA-AR-A1AR | 1 | 524  | female | 50 | yes | infiltrating ductal carcinoma    | 0 | Basal  | Tumor | 6.30691982  | 8.141746183 |
| TCGA-AR-A1AS | 0 | 1150 | female | 54 | 0   | infiltrating ductal carcinoma    | 0 | LumB   | Tumor | 6.360408269 | 7.343414567 |
| TCGA-AR-A1AW | 0 | 1072 | female | 65 | 0   | infiltrating ductal carcinoma    | 0 | LumB   | Tumor | 6.335892913 | 7.62960588  |
| TCGA-AR-A1AX | 0 | 1103 | female | 64 | 0   | infiltrating ductal carcinoma    | 0 | Basal  | Tumor | 6.334438271 | 7.617784634 |
| TCGA-AR-A1AY | 0 | 1026 | female | 65 | 0   | infiltrating ductal carcinoma    | 0 | Basal  | Tumor | 6.583664713 | 8.913414362 |
| TCGA-AR-A24M | 0 | 1991 | female | 38 | 0   | mixed histology (please specify) | 0 | LumA   | Tumor | 6.367544881 | 8.335228412 |
| TCGA-AR-A24N | 0 | 2074 | female | 54 | 0   | infiltrating ductal carcinoma    | 0 | LumB   | Tumor | 6.319818788 | 8.097133128 |
| TCGA-AR-A24Q | 0 | 3088 | female | 49 | 0   | infiltrating ductal carcinoma    | 0 | Basal  | Tumor | 7.533648017 | 8.723969185 |
| TCGA-AR-A251 | 0 | 1374 | female | 51 | 0   | infiltrating ductal carcinoma    | 0 | Basal  | Tumor | 7.375806412 | 7.639594343 |
| TCGA-AR-A256 | 1 | 2854 | female | 45 | 0   | infiltrating ductal carcinoma    | 0 | Basal  | Tumor | 6.326118351 | 7.027745849 |
| TCGA-AR-A2LM | 0 | 1585 | female | 49 | 0   | infiltrating lobular carcinoma   | 0 | LumA   | Tumor | 6.376017014 | 8.146259669 |
| TCGA-AR-A2LR | 0 | 846  | female | 49 | 0   | metaplastic carcinoma            | 0 | Basal  | Tumor | 8.7031816   | 9.622393241 |
| TCGA-AR-A5QP | 0 | 622  | female | 54 | 0   | infiltrating lobular carcinoma   | 0 | Normal | Tumor | 6.340637218 | 8.585343646 |
| TCGA-AR-A5QQ | 1 | 322  | female | 68 | 0   | other specify                    | 0 | Basal  | Tumor | 7.35287323  | 7.006524622 |
| TCGA-B6-AOI1 | 1 | 2361 | female | 73 | 0   | infiltrating ductal carcinoma    | 0 | Basal  | Tumor | 6.394270484 | 6.588672745 |
| TCGA-B6-AOI6 | 1 | 991  | female | 49 | 0   | infiltrating ductal carcinoma    | 0 | Basal  | Tumor | 6.431637569 | 7.439318689 |
| TCGA-B6-AOI9 | 1 | 362  | female | 62 | 0   | infiltrating ductal carcinoma    | 0 | Her2   | Tumor | 6.327438041 | 6.814615049 |
| TCGA-B6-AOIC | 1 | 1542 | female | 90 | 0   | other specify                    | 0 | LumB   | Tumor | 6.30504968  | 6.169827717 |

|              |   |      |        |    |   |                                  |   |        |        |             |             |
|--------------|---|------|--------|----|---|----------------------------------|---|--------|--------|-------------|-------------|
| TCGA-B6-A0IE | 1 | 1993 | female | 38 | 0 | mixed histology (please specify) | 0 | Basal  | Tumor  | 6.453806756 | 7.918701257 |
| TCGA-B6-A0IH | 1 | 3418 | female | 81 | 0 | infiltrating lobular carcinoma   | 0 | LumA   | Tumor  | 6.361896484 | 8.027128084 |
| TCGA-B6-A0IO | 0 | 3350 | female | 66 | 0 | infiltrating ductal carcinoma    | 0 | LumB   | Tumor  | 6.324628241 | 7.219523831 |
| TCGA-B6-AORG | 0 | 2082 | female | 26 | 0 | infiltrating ductal carcinoma    | 0 | LumA   | Tumor  | 6.575144267 | 7.663929228 |
| TCGA-B6-AORL | 1 | 2469 | female | 60 | 0 | infiltrating ductal carcinoma    | 0 | LumB   | Tumor  | 6.320896541 | 9.757750333 |
| TCGA-B6-AORM | 1 | 2373 | female | 57 | 0 | infiltrating ductal carcinoma    | 0 | LumB   | Tumor  | 6.457843903 | 7.916028704 |
| TCGA-B6-AORQ | 1 | 4267 | female | 68 | 0 | infiltrating lobular carcinoma   | 0 | Normal | Tumor  | 6.572048901 | 7.487691694 |
| TCGA-B6-AORT | 0 | 2721 | female | 39 | 0 | infiltrating ductal carcinoma    | 0 | Basal  | Tumor  | 6.474654006 | 7.939372079 |
| TCGA-B6-AOWZ | 0 | 3941 | female | 50 | 0 | infiltrating ductal carcinoma    | 0 | LumB   | Tumor  | 6.410620022 | 7.407185066 |
| TCGA-B6-AOX1 | 0 | 5677 | female | 48 | 0 | infiltrating ductal carcinoma    | 0 | Basal  | Tumor  | 6.580927312 | 7.695332831 |
| TCGA-B6-A1KF | 0 | 3088 | female | 68 | 0 | infiltrating ductal carcinoma    | 0 | Basal  | Tumor  | 6.367960757 | 6.792038409 |
| TCGA-B6-A408 | 0 | 2072 | female | 55 | 0 | mixed histology (please specify) | 0 | LumA   | Tumor  | 6.32695181  | 7.586859019 |
| TCGA-B6-A40B | 0 | 3152 | female | 76 | 0 | infiltrating lobular carcinoma   | 0 | LumA   | Tumor  | 6.327839096 | 7.767457428 |
| TCGA-B6-A40C | 0 | 2164 | female | 51 | 0 | infiltrating lobular carcinoma   | 0 | Her2   | Tumor  | 6.313229234 | 7.272407648 |
| TCGA-BH-AOAV | 0 | 1820 | female | 52 | 0 | infiltrating ductal carcinoma    | 0 | Basal  | Tumor  | 6.83211327  | 8.790875508 |
| TCGA-BH-AOAY | 0 | 777  | female | 62 | 0 | infiltrating ductal carcinoma    | 0 | LumB   | Tumor  | 6.48759259  | 8.068591435 |
| TCGA-BH-AOAZ | 0 | 1919 | female | 47 | 0 | infiltrating ductal carcinoma    | 0 | Normal | Normal | 6.315788884 | 9.171938297 |
| TCGA-BH-AOAZ | 0 | 1919 | female | 47 | 0 | infiltrating ductal carcinoma    | 0 | LumA   | Tumor  | 6.361509648 | 8.464875441 |
| TCGA-BH-AOB3 | 0 | 1203 | female | 53 | 0 | infiltrating ductal carcinoma    | 0 | Normal | Normal | 6.38558832  | 8.941320282 |
| TCGA-BH-AOB7 | 0 | 2559 | female | 42 | 0 | infiltrating ductal carcinoma    | 0 | Her2   | Tumor  | 6.535991637 | 8.280933472 |
| TCGA-BH-AOB8 | 0 | 1569 | female | 64 | 0 | infiltrating ductal carcinoma    | 0 | LumA   | Tumor  | 6.596397997 | 7.813290005 |
| TCGA-BH-AOB9 | 0 | 1572 | female | 44 | 0 | infiltrating ductal carcinoma    | 0 | Basal  | Tumor  | 6.45733692  | 9.607232711 |
| TCGA-BH-AOBA | 0 | 1132 | female | 51 | 0 | mixed histology (please specify) | 0 | LumA   | Tumor  | 6.703291963 | 8.245118456 |
| TCGA-BH-AOBA | 0 | 1132 | female | 51 | 0 | mixed histology (please specify) | 0 | Normal | Normal | 7.523765979 | 9.665667784 |
| TCGA-BH-AOBD | 0 | 554  | female | 47 | 0 | infiltrating ductal carcinoma    | 0 | Basal  | Tumor  | 6.391074983 | 7.809785446 |
| TCGA-BH-AOBG | 0 | 1871 | female | 73 | 0 | infiltrating ductal carcinoma    | 0 | Basal  | Tumor  | 6.433002929 | 7.886292673 |
| TCGA-BH-AOBJ | 0 | 660  | female | 41 | 0 | infiltrating ductal carcinoma    | 0 | Normal | Normal | 6.340331178 | 8.815780243 |
| TCGA-BH-AOBM | 0 | 1876 | female | 54 | 0 | infiltrating ductal carcinoma    | 0 | Normal | Normal | 6.346923365 | 7.830817866 |
| TCGA-BH-AOBQ | 0 | 2255 | female | 39 | 0 | infiltrating ductal carcinoma    | 0 | Normal | Normal | 6.346954779 | 9.11390506  |
| TCGA-BH-AOBT | 0 | 2365 | female | 56 | 0 | infiltrating ductal carcinoma    | 0 | LumA   | Tumor  | 6.343428794 | 7.586199735 |
| TCGA-BH-AOBV | 0 | 1519 | female | 78 | 0 | infiltrating ductal carcinoma    | 0 | Normal | Normal | 6.377015149 | 8.883067004 |
| TCGA-BH-AOBW | 0 | 2371 | female | 71 | 0 | infiltrating ductal carcinoma    | 0 | Basal  | Tumor  | 6.335853617 | 7.121123144 |
| TCGA-BH-AOCO | 0 | 1270 | female | 62 | 0 | infiltrating ductal carcinoma    | 0 | Normal | Normal | 6.316995483 | 8.822454004 |
| TCGA-BH-AOCO | 0 | 1270 | female | 62 | 0 | infiltrating ductal carcinoma    | 0 | LumB   | Tumor  | 6.433010305 | 7.186262888 |
| TCGA-BH-AOC7 | 0 | 2767 | female | 48 | 0 | infiltrating ductal carcinoma    | 0 | LumB   | Tumor  | 6.308965975 | 7.817344933 |

|              |   |      |        |    |   |                                |   |        |        |             |             |
|--------------|---|------|--------|----|---|--------------------------------|---|--------|--------|-------------|-------------|
| TCGA-BH-AODG | 0 | 2041 | female | 30 | 0 | infiltrating ductal carcinoma  | 0 | Her2   | Tumor  | 6.347398646 | 8.28508522  |
| TCGA-BH-AODK | 0 | 423  | female | 49 | 0 | infiltrating ductal carcinoma  | 0 | Normal | Normal | 7.068972492 | 8.197431141 |
| TCGA-BH-AODP | 0 | 476  | female | 60 | 0 | infiltrating lobular carcinoma | 0 | Normal | Normal | 6.392936642 | 8.060175743 |
| TCGA-BH-AODQ | 0 | 98   | female | 42 | 0 | infiltrating ductal carcinoma  | 0 | LumA   | Tumor  | 6.343388746 | 8.290632475 |
| TCGA-BH-AODQ | 0 | 98   | female | 42 | 0 | infiltrating ductal carcinoma  | 0 | Normal | Normal | 6.370578948 | 8.816485474 |
| TCGA-BH-AODT | 0 | 2403 | female | 41 | 0 | infiltrating ductal carcinoma  | 0 | Normal | Normal | 6.596468349 | 8.346891236 |
| TCGA-BH-AODT | 0 | 2403 | female | 41 | 0 | infiltrating ductal carcinoma  | 0 | LumA   | Tumor  | 6.33839682  | 7.850212584 |
| TCGA-BH-AODV | 0 | 2064 | female | 54 | 0 | infiltrating ductal carcinoma  | 0 | LumA   | Tumor  | 6.324367456 | 8.843383481 |
| TCGA-BH-AODV | 0 | 2064 | female | 54 | 0 | infiltrating ductal carcinoma  | 0 | Normal | Normal | 6.818740822 | 8.350668591 |
| TCGA-BH-AODZ | 0 | 495  | female | 43 | 0 | infiltrating ductal carcinoma  | 0 | Normal | Normal | 6.617574031 | 7.659969448 |
| TCGA-BH-AODZ | 0 | 495  | female | 43 | 0 | infiltrating ductal carcinoma  | 0 | Her2   | Tumor  | 6.993415405 | 7.878106653 |
| TCGA-BH-AOE1 | 0 | 477  | female | 52 | 0 | infiltrating ductal carcinoma  | 0 | LumB   | Tumor  | 6.348380279 | 7.4845448   |
| TCGA-BH-AOE6 | 0 | 293  | female | 69 | 0 | infiltrating ductal carcinoma  | 0 | Basal  | Tumor  | 6.440896624 | 7.575465105 |
| TCGA-BH-AOEB | 0 | 745  | female | 69 | 0 | infiltrating ductal carcinoma  | 0 | LumA   | Tumor  | 6.327314532 | 7.648116966 |
| TCGA-BH-AOGZ | 0 | 328  | female | 62 | 0 | infiltrating ductal carcinoma  | 0 | LumA   | Tumor  | 6.43354945  | 7.674227483 |
| TCGA-BH-AOHO | 0 | 461  | female | 69 | 0 | infiltrating ductal carcinoma  | 0 | LumB   | Tumor  | 6.373280992 | 7.087396916 |
| TCGA-BH-AOH5 | 0 | 1620 | female | 45 | 0 | infiltrating ductal carcinoma  | 0 | Normal | Normal | 6.408792983 | 9.022591362 |
| TCGA-BH-AOH5 | 0 | 1620 | female | 45 | 0 | infiltrating ductal carcinoma  | 0 | LumA   | Tumor  | 6.339362041 | 8.23843483  |
| TCGA-BH-AOH7 | 0 | 702  | female | 65 | 0 | infiltrating ductal carcinoma  | 0 | LumB   | Tumor  | 6.331349233 | 7.964082261 |
| TCGA-BH-AOH7 | 0 | 702  | female | 65 | 0 | infiltrating ductal carcinoma  | 0 | Normal | Normal | 6.46266127  | 8.461536469 |
| TCGA-BH-AOH9 | 0 | 1247 | female | 69 | 0 | infiltrating ductal carcinoma  | 0 | Normal | Normal | 6.634254034 | 9.660415747 |
| TCGA-BH-AOHB | 0 | 806  | female | 55 | 0 | infiltrating ductal carcinoma  | 0 | LumB   | Tumor  | 6.363577967 | 7.785494071 |
| TCGA-BH-AOHF | 0 | 727  | female | 77 | 0 | infiltrating ductal carcinoma  | 0 | LumA   | Tumor  | 6.533384608 | 8.730619971 |
| TCGA-BH-AOHK | 0 | 178  | female | 81 | 0 | infiltrating ductal carcinoma  | 0 | LumA   | Tumor  | 6.522958977 | 8.588131557 |
| TCGA-BH-AOHP | 0 | 414  | female | 65 | 0 | infiltrating lobular carcinoma | 0 | Normal | Tumor  | 6.323838269 | 7.358887121 |
| TCGA-BH-AOHQ | 0 | 1121 | female | 56 | 0 | infiltrating ductal carcinoma  | 0 | LumA   | Tumor  | 6.431230223 | 7.781160201 |
| TCGA-BH-AOHX | 0 | 829  | female | 54 | 0 | infiltrating ductal carcinoma  | 0 | LumB   | Tumor  | 6.463126608 | 7.912377564 |
| TCGA-BH-AOW7 | 0 | 1363 | female | 49 | 0 | infiltrating ductal carcinoma  | 0 | Her2   | Tumor  | 6.410684751 | 7.866734385 |
| TCGA-BH-AOWA | 0 | 701  | female | 82 | 0 | metaplastic carcinoma          | 0 | Basal  | Tumor  | 7.101171686 | 8.350253343 |
| TCGA-BH-A202 | 0 | 795  | female | 60 | 0 | infiltrating ductal carcinoma  | 0 | Her2   | Tumor  | 6.369981173 | 7.848330964 |
| TCGA-BH-A6R8 | 0 | 293  | female | 46 | 0 | infiltrating ductal carcinoma  | 0 | LumA   | Tumor  | 6.334871522 | 6.761079785 |
| TCGA-BH-A6R9 | 0 | 160  | female | 61 | 0 | metaplastic carcinoma          | 0 | Basal  | Tumor  | 6.608042317 | 8.215488548 |
| TCGA-BH-A8FZ | 0 | 574  | female | 58 | 0 | infiltrating lobular carcinoma | 0 | Normal | Tumor  | 6.416875048 | 8.348559874 |
| TCGA-C8-A12M | 0 | 358  | female | 70 | 0 | infiltrating ductal carcinoma  | 0 | LumB   | Tumor  | 6.373912014 | 7.949082885 |
| TCGA-C8-A12N | 0 | 358  | female | 58 | 0 | infiltrating ductal carcinoma  | 0 | LumA   | Tumor  | 6.340204314 | 8.080007968 |

|              |   |     |        |    |    |                                |   |       |       |             |             |
|--------------|---|-----|--------|----|----|--------------------------------|---|-------|-------|-------------|-------------|
| TCGA-C8-A12U | 0 | 385 | female | 46 | 0  | infiltrating ductal carcinoma  | 0 | LumB  | Tumor | 6.6545916   | 6.353789753 |
| TCGA-C8-A12W | 0 | 385 | female | 49 | 0  | infiltrating ductal carcinoma  | 0 | Her2  | Tumor | 6.899878067 | 7.647710449 |
| TCGA-C8-A12Z | 0 | 382 | female | 45 | 0  | infiltrating ductal carcinoma  | 0 | Her2  | Tumor | 6.368071142 | 7.4164556   |
| TCGA-C8-A130 | 0 | 96  | female | 52 | 0  | infiltrating ductal carcinoma  | 0 | Her2  | Tumor | 6.336727352 | 7.480900092 |
| TCGA-C8-A135 | 0 | 32  | female | 64 | 0  | infiltrating ductal carcinoma  | 0 | Her2  | Tumor | 6.588971083 | 8.154364571 |
| TCGA-C8-A1HE | 0 | 375 | female | 59 | 0  | infiltrating ductal carcinoma  | 0 | LumA  | Tumor | 6.312764502 | 7.234521186 |
| TCGA-C8-A1HG | 0 | 345 | female | 50 | 0  | infiltrating ductal carcinoma  | 0 | LumB  | Tumor | 6.702588828 | 7.192720912 |
| TCGA-C8-A1HO | 0 | 375 | female | 34 | 0  | infiltrating ductal carcinoma  | 0 | LumB  | Tumor | 6.324023563 | 7.420960847 |
| TCGA-C8-A26W | 0 | 381 | female | 58 | 0  | infiltrating ductal carcinoma  | 0 | Her2  | Tumor | 6.368004512 | 7.728413641 |
| TCGA-C8-A274 | 0 | 290 | female | 63 | 0  | infiltrating ductal carcinoma  | 0 | LumB  | Tumor | 6.315739621 | 6.959467235 |
| TCGA-C8-A27B | 0 | 439 | female | 48 | 0  | infiltrating ductal carcinoma  | 0 | Basal | Tumor | 6.651239606 | 6.460984391 |
| TCGA-C8-A3M8 | 0 | 394 | female | 68 | 0  | infiltrating lobular carcinoma | 0 | LumB  | Tumor | 6.310909684 | 7.158307282 |
| TCGA-C8-A8HP | 0 | 396 | female | 59 | 0  | metaplastic carcinoma          | 0 | Her2  | Tumor | 6.474141439 | 7.203692029 |
| TCGA-D8-A13Y | 0 | 362 | female | 52 | 0  | infiltrating ductal carcinoma  | 0 | Her2  | Tumor | 9.549769082 | 7.079306056 |
| TCGA-D8-A142 | 0 | 425 | female | 74 | 0  | infiltrating ductal carcinoma  | 0 | Basal | Tumor | 8.233864628 | 10.42143543 |
| TCGA-D8-A146 | 0 | 643 | female | 57 | 0  | infiltrating ductal carcinoma  | 0 | LumA  | Tumor | 6.327486985 | 7.908883259 |
| TCGA-D8-A147 | 0 | 584 | female | 45 | 0  | infiltrating ductal carcinoma  | 0 | Basal | Tumor | 6.800363284 | 7.041995036 |
| TCGA-D8-A1J9 | 0 | 532 | female | 48 | 0  | infiltrating ductal carcinoma  | 0 | Her2  | Tumor | 11.11341595 | 7.346224006 |
| TCGA-D8-A1JE | 0 | 575 | female | 62 | 0  | infiltrating ductal carcinoma  | 0 | LumB  | Tumor | 6.31889698  | 8.2357001   |
| TCGA-D8-A1JF | 0 | 366 | female | 79 | 0  | infiltrating ductal carcinoma  | 0 | Her2  | Tumor | 6.550331101 | 9.136844647 |
| TCGA-D8-A1JG | 0 | 366 | female | 62 | 0  | infiltrating ductal carcinoma  | 0 | Her2  | Tumor | 6.311026814 | 8.700032319 |
| TCGA-D8-A1JM | 0 | 590 | female | 59 | 0  | infiltrating ductal carcinoma  | 0 | Basal | Tumor | 6.718130138 | 10.66135987 |
| TCGA-D8-A1JN | 0 | 620 | female | 80 | 0  | infiltrating lobular carcinoma | 0 | LumA  | Tumor | 6.372671324 | 6.971516046 |
| TCGA-D8-A1JP | 0 | 639 | female | 73 | 0  | infiltrating ductal carcinoma  | 0 | LumB  | Tumor | 6.541583923 | 8.19024577  |
| TCGA-D8-A1JU | 0 | 447 | female | 51 | 0  | infiltrating ductal carcinoma  | 0 | LumA  | Tumor | 6.322523506 | 9.201801659 |
| TCGA-D8-A1XG | 0 | 448 | female | 86 | 0  | infiltrating ductal carcinoma  | 0 | LumA  | Tumor | 6.343460958 | 6.688248136 |
| TCGA-D8-A1XJ | 0 | 664 | female | 76 | no | other specify                  | 0 | Her2  | Tumor | 6.392695659 | 7.591421677 |
| TCGA-D8-A1XK | 0 | 441 | female | 55 | 0  | infiltrating ductal carcinoma  | 0 | Basal | Tumor | 6.98950992  | 7.395911719 |
| TCGA-D8-A1XM | 0 | 538 | female | 57 | 0  | infiltrating ductal carcinoma  | 0 | LumA  | Tumor | 6.30623842  | 8.082616214 |
| TCGA-D8-A1XQ | 0 | 499 | female | 69 | 0  | infiltrating ductal carcinoma  | 0 | Basal | Tumor | 6.319576501 | 7.123298976 |
| TCGA-D8-A1XR | 0 | 482 | female | 56 | 0  | infiltrating ductal carcinoma  | 0 | LumB  | Tumor | 6.307200273 | 7.385534672 |
| TCGA-D8-A1XW | 0 | 385 | female | 53 | 0  | infiltrating ductal carcinoma  | 0 | Basal | Tumor | 6.472264653 | 7.076351746 |
| TCGA-D8-A1Y0 | 0 | 472 | female | 65 | 0  | infiltrating ductal carcinoma  | 0 | LumB  | Tumor | 6.300893862 | 7.934893121 |
| TCGA-D8-A1Y3 | 0 | 430 | female | 61 | 0  | infiltrating ductal carcinoma  | 0 | Her2  | Tumor | 6.334625176 | 6.782171791 |
| TCGA-D8-A27E | 0 | 530 | female | 66 | 0  | other specify                  | 0 | LumA  | Tumor | 6.383200143 | 6.916538136 |



|              |   |      |        |    |     |                                  |   |        |        |             |             |
|--------------|---|------|--------|----|-----|----------------------------------|---|--------|--------|-------------|-------------|
| TCGA-D8-A27F | 0 | 488  | female | 40 | 0   | infiltrating ductal carcinoma    | 0 | Basal  | Tumor  | 7.11577321  | 7.665520647 |
| TCGA-D8-A27H | 0 | 397  | female | 72 | 0   | infiltrating ductal carcinoma    | 0 | Basal  | Tumor  | 6.747062494 | 7.877468071 |
| TCGA-D8-A27I | 0 | 439  | female | 58 | 0   | infiltrating lobular carcinoma   | 0 | Normal | Tumor  | 6.311748039 | 8.819743236 |
| TCGA-D8-A27M | 0 | 410  | female | 59 | 0   | infiltrating ductal carcinoma    | 0 | Basal  | Tumor  | 6.468193647 | 8.383595839 |
| TCGA-D8-A27N | 0 | 519  | female | 36 | 0   | infiltrating ductal carcinoma    | 0 | Her2   | Tumor  | 6.325474561 | 8.037038634 |
| TCGA-D8-A27P | 0 | 49   | female | 64 | 0   | infiltrating ductal carcinoma    | 0 | LumA   | Tumor  | 6.465733735 | 7.335820671 |
| TCGA-D8-A27T | 0 | 398  | female | 53 | 0   | infiltrating lobular carcinoma   | 0 | LumB   | Tumor  | 6.324597472 | 8.186040785 |
| TCGA-D8-A27W | 0 | 373  | female | 55 | 0   | mucinous carcinoma               | 0 | LumB   | Tumor  | 6.307467706 | 7.125869073 |
| TCGA-D8-A73U | 0 | 492  | female | 88 | 0   | infiltrating lobular carcinoma   | 0 | LumA   | Tumor  | 6.492216795 | 7.82692383  |
| TCGA-D8-A73W | 0 | 244  | female | 79 | 0   | mucinous carcinoma               | 0 | LumB   | Tumor  | 6.422060329 | 7.323431041 |
| TCGA-D8-A73X | 0 | 368  | female | 53 | 0   | other specify                    | 0 | LumA   | Tumor  | 6.331052007 | 7.822742849 |
| TCGA-E2-A105 | 0 | 1308 | female | 79 | 0   | infiltrating ductal carcinoma    | 0 | LumB   | Tumor  | 6.320783968 | 7.204675006 |
| TCGA-E2-A10A | 0 | 1229 | female | 41 | yes | infiltrating ductal carcinoma    | 0 | LumB   | Tumor  | 6.324740082 | 7.177297815 |
| TCGA-E2-A10B | 0 | 1141 | female | 67 | 0   | infiltrating ductal carcinoma    | 0 | LumB   | Tumor  | 6.316300076 | 7.860161469 |
| TCGA-E2-A10E | 0 | 865  | female | 64 | 0   | infiltrating ductal carcinoma    | 0 | LumB   | Tumor  | 6.509337406 | 7.60145333  |
| TCGA-E2-A10F | 0 | 878  | female | 47 | 0   | infiltrating lobular carcinoma   | 0 | LumA   | Tumor  | 6.331630759 | 8.060127963 |
| TCGA-E2-A14Q | 0 | 1163 | female | 50 | 0   | infiltrating ductal carcinoma    | 0 | LumA   | Tumor  | 6.327946308 | 7.924738359 |
| TCGA-E2-A14R | 0 | 1174 | female | 62 | 0   | infiltrating ductal carcinoma    | 0 | Basal  | Tumor  | 6.359845627 | 6.59350378  |
| TCGA-E2-A14T | 0 | 1013 | female | 52 | 0   | infiltrating ductal carcinoma    | 0 | LumB   | Tumor  | 6.314577672 | 7.265037748 |
| TCGA-E2-A14U | 0 | 1318 | female | 74 | 0   | infiltrating lobular carcinoma   | 0 | Normal | Tumor  | 6.473119393 | 7.066859336 |
| TCGA-E2-A14Y | 0 | 870  | female | 35 | 0   | infiltrating ductal carcinoma    | 0 | Basal  | Tumor  | 6.47304495  | 7.888951494 |
| TCGA-E2-A153 | 0 | 707  | female | 51 | 0   | infiltrating ductal carcinoma    | 0 | Normal | Normal | 7.550554132 | 8.326037747 |
| TCGA-E2-A154 | 0 | 591  | female | 68 | 0   | infiltrating ductal carcinoma    | 0 | LumB   | Tumor  | 6.362787496 | 7.328783099 |
| TCGA-E2-A159 | 0 | 762  | female | 50 | 0   | infiltrating ductal carcinoma    | 0 | Basal  | Tumor  | 6.81266128  | 7.951142914 |
| TCGA-E2-A15E | 0 | 630  | female | 40 | 0   | infiltrating ductal carcinoma    | 0 | Normal | Tumor  | 6.638053964 | 7.799091753 |
| TCGA-E2-A15F | 0 | 658  | female | 64 | 0   | infiltrating ductal carcinoma    | 0 | Normal | Tumor  | 6.347422472 | 7.267105217 |
| TCGA-E2-A15G | 0 | 554  | female | 76 | 0   | mixed histology (please specify) | 0 | LumA   | Tumor  | 6.34561253  | 7.146097812 |
| TCGA-E2-A15I | 0 | 530  | female | 44 | 0   | infiltrating ductal carcinoma    | 0 | LumA   | Tumor  | 6.330931084 | 8.031681133 |
| TCGA-E2-A15S | 0 | 428  | female | 34 | 0   | infiltrating ductal carcinoma    | 0 | LumB   | Tumor  | 6.374370304 | 7.871614645 |
| TCGA-E2-A1B6 | 0 | 867  | female | 44 | 0   | infiltrating ductal carcinoma    | 0 | Basal  | Tumor  | 6.456826396 | 7.467825075 |
| TCGA-E2-A1BD | 0 | 520  | female | 53 | 0   | infiltrating ductal carcinoma    | 0 | LumA   | Tumor  | 6.508409145 | 7.897478869 |
| TCGA-E2-A1IF | 0 | 1138 | female | 74 | 0   | infiltrating ductal carcinoma    | 0 | LumA   | Tumor  | 6.416404812 | 8.120005808 |
| TCGA-E2-A1II | 0 | 1025 | female | 51 | 0   | infiltrating ductal carcinoma    | 0 | Basal  | Tumor  | 6.372315508 | 8.839155554 |
| TCGA-E2-A1IJ | 0 | 865  | female | 57 | 0   | infiltrating lobular carcinoma   | 0 | LumA   | Tumor  | 6.472435448 | 8.431090098 |
| TCGA-E2-A1L7 | 0 | 834  | female | 40 | 0   | infiltrating ductal carcinoma    | 0 | LumB   | Tumor  | 6.588069447 | 7.254539705 |

|              |   |      |        |    |   |                                  |   |        |        |             |             |
|--------------|---|------|--------|----|---|----------------------------------|---|--------|--------|-------------|-------------|
| TCGA-E2-A1LB | 0 | 1231 | female | 41 | 0 | infiltrating ductal carcinoma    | 0 | Normal | Normal | 6.341015838 | 8.688409064 |
| TCGA-E2-A1LB | 0 | 1231 | female | 41 | 0 | infiltrating ductal carcinoma    | 0 | Her2   | Tumor  | 6.440912725 | 7.852973578 |
| TCGA-E2-A1LG | 0 | 574  | female | 50 | 0 | infiltrating lobular carcinoma   | 0 | Basal  | Tumor  | 6.486467063 | 9.48483535  |
| TCGA-E2-A1LH | 0 | 3247 | female | 59 | 0 | infiltrating ductal carcinoma    | 0 | Basal  | Tumor  | 7.92898154  | 7.656296538 |
| TCGA-E2-A1LI | 0 | 3121 | female | 57 | 0 | infiltrating ductal carcinoma    | 0 | Basal  | Tumor  | 6.321328316 | 8.550442143 |
| TCGA-E2-A1LS | 0 | 470  | female | 46 | 0 | infiltrating ductal carcinoma    | 0 | Normal | Normal | 6.34588869  | 11.58344864 |
| TCGA-E2-A2P6 | 0 | 168  | female | 77 | 0 | infiltrating lobular carcinoma   | 0 | LumB   | Tumor  | 6.326555744 | 7.199701515 |
| TCGA-E2-A570 | 0 | 931  | female | 47 | 0 | infiltrating ductal carcinoma    | 0 | LumB   | Tumor  | 6.357691907 | 7.864142491 |
| TCGA-E2-A572 | 0 | 1208 | female | 72 | 0 | infiltrating ductal carcinoma    | 0 | LumA   | Tumor  | 6.396916104 | 7.008531683 |
| TCGA-E2-A574 | 0 | 808  | female | 44 | 0 | infiltrating ductal carcinoma    | 0 | Basal  | Tumor  | 6.375711664 | 8.850987287 |
| TCGA-E2-A9RU | 0 | 391  | female | 90 | 0 | infiltrating ductal carcinoma    | 0 | Her2   | Tumor  | 6.410276343 | 7.271942265 |
| TCGA-E9-A1N6 | 0 | 410  | female | 52 | 0 | infiltrating ductal carcinoma    | 0 | Normal | Normal | 6.352699039 | 9.603394883 |
| TCGA-E9-A1N9 | 0 | 399  | female | 58 | 0 | mixed histology (please specify) | 0 | Normal | Normal | 7.340971334 | 9.27686519  |
| TCGA-E9-A1NC | 0 | 708  | female | 61 | 0 | mixed histology (please specify) | 0 | Basal  | Tumor  | 6.359184844 | 8.026451021 |
| TCGA-E9-A1NE | 0 | 420  | female | 28 | 0 | infiltrating ductal carcinoma    | 0 | Basal  | Tumor  | 6.307685671 | 8.308863384 |
| TCGA-E9-A1NG | 0 | 656  | female | 62 | 0 | infiltrating ductal carcinoma    | 0 | LumA   | Tumor  | 6.322138795 | 8.780798201 |
| TCGA-E9-A1R6 | 0 | 339  | female | 63 | 0 | infiltrating ductal carcinoma    | 0 | LumB   | Tumor  | 6.617786172 | 7.282402688 |
| TCGA-E9-A1R7 | 0 | 645  | female | 64 | 0 | infiltrating ductal carcinoma    | 0 | LumB   | Tumor  | 6.407433059 | 7.422126644 |
| TCGA-E9-A1RA | 0 | 608  | female | 48 | 0 | infiltrating ductal carcinoma    | 0 | LumA   | Tumor  | 6.355355212 | 7.636765466 |
| TCGA-E9-A1RB | 0 | 633  | female | 40 | 0 | infiltrating ductal carcinoma    | 0 | Normal | Normal | 6.322726151 | 10.47662535 |
| TCGA-E9-A1RC | 0 | 1224 | female | 56 | 0 | mixed histology (please specify) | 0 | LumB   | Tumor  | 6.405958683 | 7.735346691 |
| TCGA-E9-A1RG | 0 | 647  | female | 62 | 0 | infiltrating ductal carcinoma    | 0 | LumB   | Tumor  | 6.361980565 | 7.132389989 |
| TCGA-E9-A1RI | 0 | 425  | female | 43 | 0 | mixed histology (please specify) | 0 | Normal | Normal | 6.346816421 | 10.33797819 |
| TCGA-E9-A22E | 0 | 392  | female | 56 | 0 | infiltrating ductal carcinoma    | 0 | LumB   | Tumor  | 6.337425028 | 8.536274847 |
| TCGA-E9-A248 | 0 | 59   | female | 51 | 0 | infiltrating ductal carcinoma    | 0 | Basal  | Tumor  | 6.707977955 | 7.309269648 |
| TCGA-E9-A2JS | 0 | 540  | female | 72 | 0 | infiltrating lobular carcinoma   | 0 | LumB   | Tumor  | 6.675932136 | 6.86430256  |
| TCGA-E9-A3X8 | 0 | 478  | female | 48 | 0 | infiltrating lobular carcinoma   | 0 | Normal | Tumor  | 6.518749595 | 8.359829854 |
| TCGA-E9-A5FL | 0 | 24   | female | 65 | 0 | metaplastic carcinoma            | 0 | Basal  | Tumor  | 6.561947227 | 8.735221631 |
| TCGA-E9-A6HE | 0 | 468  | female | 45 | 0 | infiltrating lobular carcinoma   | 0 | LumB   | Tumor  | 6.34668274  | 7.592127118 |
| TCGA-EW-A1IY | 0 | 258  | female | 38 | 0 | infiltrating ductal carcinoma    | 0 | LumB   | Tumor  | 6.50821278  | 8.231160591 |
| TCGA-EW-A1J1 | 0 | 575  | female | 38 | 0 | infiltrating ductal carcinoma    | 0 | LumA   | Tumor  | 6.317664391 | 6.738949805 |
| TCGA-EW-A1OY | 0 | 908  | female | 63 | 0 | infiltrating ductal carcinoma    | 0 | LumB   | Tumor  | 6.368545979 | 7.087107146 |
| TCGA-EW-A1P4 | 0 | 907  | female | 43 | 0 | medullary carcinoma              | 0 | Basal  | Tumor  | 6.628378447 | 8.871043963 |
| TCGA-EW-A1P6 | 0 | 562  | female | 64 | 0 | infiltrating ductal carcinoma    | 0 | LumB   | Tumor  | 6.373645777 | 7.947013351 |
| TCGA-EW-A1P7 | 0 | 915  | female | 59 | 0 | infiltrating ductal carcinoma    | 0 | Basal  | Tumor  | 6.813171366 | 8.342146798 |

|              |   |      |        |    |   |                                |   |        |        |             |             |
|--------------|---|------|--------|----|---|--------------------------------|---|--------|--------|-------------|-------------|
| TCGA-EW-A1PC | 0 | 187  | female | 66 | 0 | infiltrating ductal carcinoma  | 0 | Her2   | Tumor  | 6.441255377 | 6.963846729 |
| TCGA-EW-A1PE | 0 | 320  | female | 56 | 0 | infiltrating ductal carcinoma  | 0 | LumB   | Tumor  | 6.322574845 | 7.13049636  |
| TCGA-EW-A1PF | 0 | 439  | female | 50 | 0 | infiltrating ductal carcinoma  | 0 | LumA   | Tumor  | 6.330437499 | 7.908837896 |
| TCGA-EW-A2FR | 0 | 1309 | female | 59 | 0 | infiltrating ductal carcinoma  | 0 | Her2   | Tumor  | 6.50529872  | 8.647017013 |
| TCGA-EW-A2FV | 0 | 428  | female | 39 | 0 | other specify                  | 0 | Basal  | Tumor  | 6.31658893  | 8.060705466 |
| TCGA-EW-A2FW | 0 | 412  | female | 52 | 0 | other specify                  | 0 | LumB   | Tumor  | 6.340280483 | 7.386726377 |
| TCGA-EW-A3U0 | 0 | 532  | female | 61 | 0 | infiltrating ductal carcinoma  | 0 | Basal  | Tumor  | 6.339563036 | 7.453501459 |
| TCGA-EW-A6S9 | 0 | 463  | female | 34 | 0 | infiltrating ductal carcinoma  | 0 | Her2   | Tumor  | 6.407566919 | 7.527273284 |
| TCGA-GI-A2C9 | 0 | 3342 | female | 58 | 0 | infiltrating ductal carcinoma  | 0 | Basal  | Tumor  | 6.966423688 | 9.061590477 |
| TCGA-GI-A2C9 | 0 | 3342 | female | 58 | 0 | infiltrating ductal carcinoma  | 0 | Normal | Normal | 6.323402742 | 9.291144943 |
| TCGA-GM-A2DF | 0 | 2155 | female | 53 | 0 | infiltrating ductal carcinoma  | 0 | Basal  | Tumor  | 6.774516207 | 7.422274254 |
| TCGA-GM-A2DH | 0 | 2193 | female | 58 | 0 | infiltrating ductal carcinoma  | 0 | Her2   | Tumor  | 7.413044356 | 7.117768936 |
| TCGA-GM-A3NW | 0 | 3361 | female | 63 | 0 | infiltrating lobular carcinoma | 0 | Normal | Tumor  | 6.338853803 | 7.467960555 |
| TCGA-GM-A3XL | 0 | 2108 | female | 49 | 0 | infiltrating ductal carcinoma  | 0 | Basal  | Tumor  | 6.6237156   | 6.491433878 |
| TCGA-LD-A66U | 0 | 422  | female | 44 | 0 | infiltrating lobular carcinoma | 0 | LumA   | Tumor  | 6.336586887 | 7.771430242 |
| TCGA-LD-A74U | 0 | 402  | female | 79 | 0 | other specify                  | 0 | Normal | Tumor  | 6.407061794 | 7.809224873 |
| TCGA-LL-A442 | 0 | 889  | female | 56 | 0 | infiltrating ductal carcinoma  | 0 | LumA   | Tumor  | 6.313776868 | 6.313776868 |
| TCGA-LL-A5Y0 | 0 | 440  | female | 50 | 0 | infiltrating ductal carcinoma  | 0 | Her2   | Tumor  | 6.576143158 | 7.419521886 |
| TCGA-LL-A6FR | 0 | 489  | female | 50 | 0 | infiltrating ductal carcinoma  | 0 | Basal  | Tumor  | 6.498695691 | 7.618518544 |
| TCGA-LL-A73Y | 0 | 477  | female | 67 | 0 | infiltrating ductal carcinoma  | 0 | Basal  | Tumor  | 7.769647499 | 9.164086284 |
| TCGA-LL-A740 | 0 | 441  | female | 61 | 0 | infiltrating ductal carcinoma  | 0 | Her2   | Tumor  | 6.858212855 | 8.118472878 |
| TCGA-LL-A8F5 | 0 | 596  | female | 61 | 0 | infiltrating ductal carcinoma  | 0 | Basal  | Tumor  | 6.37071411  | 7.07617051  |
| TCGA-LL-A9Q3 | 0 | 532  | female | 69 | 0 | infiltrating lobular carcinoma | 0 | LumA   | Tumor  | 6.381370692 | 7.282276715 |
| TCGA-LQ-A4E4 | 0 | 849  | female | 73 | 0 | infiltrating lobular carcinoma | 0 | LumB   | Tumor  | 6.44156525  | 7.446960834 |
| TCGA-OL-A5RU | 0 | 1219 | female | 63 | 0 | infiltrating ductal carcinoma  | 0 | LumA   | Tumor  | 6.349073024 | 7.735694484 |
| TCGA-OL-A5RW | 0 | 1106 | female | 40 | 0 | infiltrating ductal carcinoma  | 0 | Basal  | Tumor  | 6.654108367 | 8.276882369 |
| TCGA-OL-A5RX | 0 | 878  | female | 51 | 0 | infiltrating ductal carcinoma  | 0 | Normal | Tumor  | 6.345303275 | 8.123980992 |
| TCGA-OL-A5S0 | 0 | 620  | female | 66 | 0 | infiltrating ductal carcinoma  | 0 | Basal  | Tumor  | 6.450292758 | 7.740981163 |
| TCGA-OL-A66H | 0 | 812  | female | 74 | 0 | mucinous carcinoma             | 0 | LumA   | Tumor  | 6.348524557 | 7.506560694 |
| TCGA-OL-A66I | 0 | 714  | female | 36 | 0 | infiltrating ductal carcinoma  | 0 | Basal  | Tumor  | 6.56229     | 8.483312907 |
| TCGA-OL-A66J | 0 | 1996 | female | 80 | 0 | infiltrating lobular carcinoma | 0 | LumA   | Tumor  | 6.351737533 | 8.11773544  |
| TCGA-OL-A66O | 0 | 528  | female | 39 | 0 | infiltrating ductal carcinoma  | 0 | LumB   | Tumor  | 6.345431636 | 7.242286381 |
| TCGA-OL-A66P | 0 | 428  | female | 75 | 0 | infiltrating ductal carcinoma  | 0 | Her2   | Tumor  | 6.655375296 | 7.891221369 |
| TCGA-OL-A6V0 | 0 | 858  | female | 43 | 0 | infiltrating ductal carcinoma  | 0 | Basal  | Tumor  | 7.92429187  | 7.503256117 |
| TCGA-OL-A6VR | 0 | 1220 | female | 48 | 0 | infiltrating ductal carcinoma  | 0 | LumA   | Tumor  | 6.323032181 | 7.638365273 |

|              |   |      |        |    |   |                                |   |        |       |             |             |
|--------------|---|------|--------|----|---|--------------------------------|---|--------|-------|-------------|-------------|
| TCGA-PL-A8LV | 0 | -7   | female | 54 | 0 | medullary carcinoma            | 0 | Basal  | Tumor | 7.143472889 | 10.38466822 |
| TCGA-PL-A8LX | 0 | 5    | female | 35 | 0 | infiltrating ductal carcinoma  | 0 | LumA   | Tumor | 6.437840552 | 7.676853203 |
| TCGA-S3-A6ZF | 0 | 502  | female | 64 | 0 | infiltrating ductal carcinoma  | 0 | LumB   | Tumor | 6.441834287 | 7.645617625 |
| TCGA-S3-A6ZG | 0 | 399  | female | 71 | 0 | infiltrating lobular carcinoma | 0 | LumB   | Tumor | 6.321895016 | 7.211984488 |
| TCGA-S3-A6ZH | 0 | 515  | female | 29 | 0 | infiltrating ductal carcinoma  | 0 | Her2   | Tumor | 6.327928443 | 7.360962525 |
| TCGA-S3-AAOZ | 0 | 511  | female | 63 | 0 | infiltrating ductal carcinoma  | 0 | Basal  | Tumor | 6.396496648 | 7.035567556 |
| TCGA-UL-AAZ6 | 0 | 518  | female | 73 | 0 | infiltrating ductal carcinoma  | 0 | Her2   | Tumor | 7.102024888 | 7.734808846 |
| TCGA-V7-A7HQ | 0 | 2033 | female | 75 | 0 | infiltrating ductal carcinoma  | 0 | LumA   | Tumor | 6.63288315  | 7.443415819 |
| TCGA-WT-AB44 | 0 | 883  | female | 77 | 0 | infiltrating lobular carcinoma | 0 | LumA   | Tumor | 6.429106929 | 7.915486374 |
| TCGA-XX-A89A | 0 | 488  | female | 68 | 0 | infiltrating lobular carcinoma | 0 | Normal | Tumor | 6.7286042   | 8.548356963 |
| TCGA-Z7-A8R5 | 0 | 3287 | female | 61 | 0 | infiltrating lobular carcinoma | 0 | Normal | Tumor | 6.46963335  | 7.10323772  |
| TCGA-Z7-A8R6 | 0 | 3256 | female | 46 | 0 | infiltrating lobular carcinoma | 0 | LumB   | Tumor | 6.40784244  | 7.147810947 |

---
